# Supplementary material for: Real World Evidence of Effectiveness of COVID-19 Vaccines and Anti SARS-CoV-2 Monoclonal Antibodies Against Post-Acute Sequelae of SARS-CoV-2 Infection
Source: bioRxiv or medRxiv preprint supplement (doi:10.1101/2022.06.30.22277105), 2022-07-02
Supplement: Supplementary file [file media-1.pdf]

**Supplemental Table 1:** Demographic, social, comorbidity, and clinical characteristics of individuals with and without Post-Acute Sequelae of SARS-CoV-2 infection (PASC) from the TriNetX cohort.

|                                               | <b>PASC</b><br>(N = 70,648) <sup>1</sup> | <b>Non-PASC</b><br>(N = 561,035) <sup>1</sup> | <b>OR (95% CI)</b>        |
|-----------------------------------------------|------------------------------------------|-----------------------------------------------|---------------------------|
| <b>Age Categories (years):</b>                |                                          |                                               |                           |
| >= 65                                         | 17,824<br>(25.2)                         | 120,577 (21.5)                                | <i>Reference Category</i> |
| 40 to 64                                      | 31,870<br>(45.1)                         | 237,924 (42.4)                                | 0.70 (0.69, 0.72)         |
| 18 to 39                                      | 20,954<br>(29.7)                         | 14,938 (31.6)                                 | 0.91 (0.89, 0.92)         |
| <b>Females:</b>                               | 44,501<br>(63.0)                         | 202,534 (36.1)                                | 1.42 (1.40, 1.45)         |
| <b>Charlson Comorbidity Index Categories:</b> |                                          |                                               |                           |
| 0 to 1                                        | 41,994<br>(59.4)                         | 431,234 (76.9)                                | <i>Reference Category</i> |

|                                            |                  |               |                   |
|--------------------------------------------|------------------|---------------|-------------------|
| 2 to 4                                     | 15,927<br>(22.5) | 79,538 (14.2) | 2.06 (2.02, 2.10) |
| 5+                                         | 12,727<br>(18.0) | 50,263 (9.0)  |                   |
| <b>Severe COVID-19:</b>                    | 902 (1.3)        | 5,409 (1.0)   | 1.33 (1.24, 1.42) |
| <b>Breakthrough /<br/>Vaccinated Cases</b> | 121 (0.2)        | 3,226 (0.6)   | 0.30 (0.25, 0.35) |
| <b>mAb Treated</b>                         | 1,199 (1.7)      | 14,462 (2.6)  | 0.65 (0.61, 0.69) |

<sup>1</sup> n (%)

PASC: Post-Acute Sequelae of COVID

**Supplemental Table 2:** Frequencies of individual constitutional and systemic symptoms in the overall PASC group and among the vaccinated and mAb treated individuals from the TrinetX cohort.

|                                 | <b>Total PASC<br/>(N = 70,648)<sub>1</sub></b> | <b>Vaccinated<br/>PASC<br/>(N = 121)<sub>1</sub></b> | <b>mAb Treated<br/>PASC<br/>(N = 1,199)<sub>1</sub></b> |
|---------------------------------|------------------------------------------------|------------------------------------------------------|---------------------------------------------------------|
| <b>Constitutional Symptoms:</b> |                                                |                                                      |                                                         |
| Palpitation                     | 6,153 (8.7)                                    | 3 (2.5)                                              | 84 (7.0)                                                |
| Headache                        | 12,472 (17.7)                                  | 19 (15.7)                                            | 168 (14.0)                                              |
| Malaise and/or<br>Fatigue       | 14,847 (21.0)                                  | 31 (25.6)                                            | 262 (21.9)                                              |
| <b>Systemic Symptoms:</b>       |                                                |                                                      |                                                         |
| Cough                           | 11,976 (17.0)                                  | 23 (19.0)                                            | 235 (19.6)                                              |
| Shortness of<br>Breath          | 15,512 (22.0)                                  | 24 (19.8)                                            | 310 (25.9)                                              |
| Taste and/or<br>Smell Changes   | 2,018 (2.9)                                    | 2 (1.7)                                              | 26 (2.2)                                                |
| Sleep Disorder                  | 11,565 (16.4)                                  | 14 (11.6)                                            | 222 (18.5)                                              |

|                        | <b>Total PASC<br/>(N = 70,648)<sup>1</sup></b> | <b>Vaccinated<br/>PASC<br/>(N = 121)<sup>1</sup></b> | <b>mAb Treated<br/>PASC<br/>(N = 1,199)<sup>1</sup></b> |
|------------------------|------------------------------------------------|------------------------------------------------------|---------------------------------------------------------|
| Cognitive Impairment   | 3,535 (5.0)                                    | 16 (13.2)                                            | 83 (6.9)                                                |
| Mood/Anxiety Disorders | 17,254 (24.4)                                  | 18 (14.9)                                            | 203 (16.9)                                              |

Abbreviations: PASC: Post-Acute Sequelae of SARS-CoV-2 infection.

<sup>1</sup> n (%)

**Supplemental Figure 1: Factors associated with PASC and individual PASC symptom / conditions for breakthrough and mAb treated COVID-19 survivors in replication analysis.**

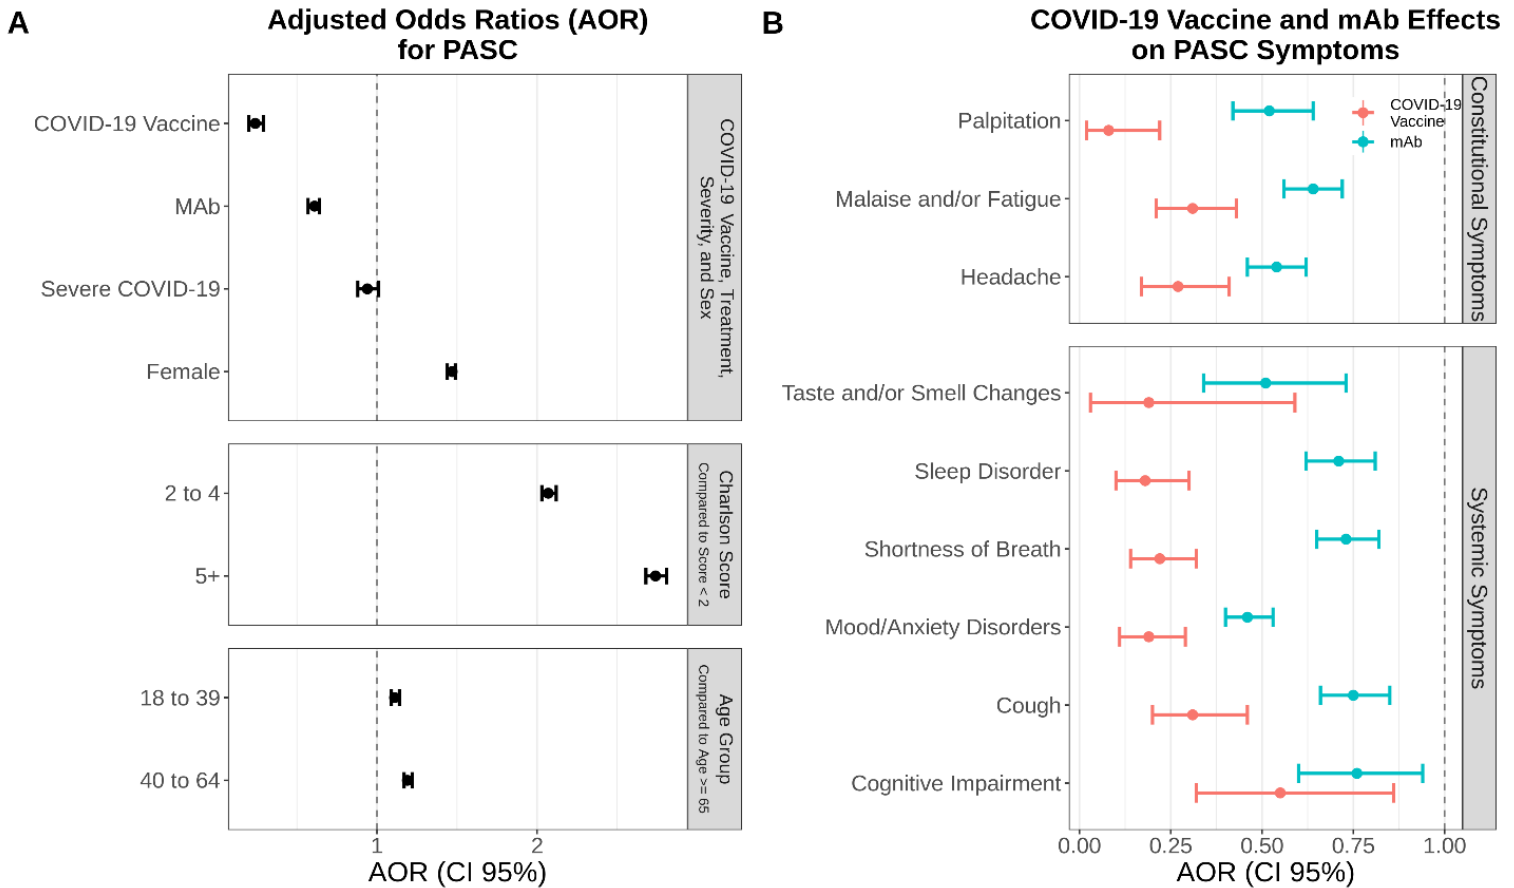

Supplemental Figure 1. A) Likelihood of developing PASC in replication analysis. aORs (95% CI) are shown for vaccines and mAb along with all covariates. B) aORs (CI) of developing individual PASC symptoms for vaccines (red) and mAb (blue) in the replication analysis.

PASC: Post-Acute Sequelae of SARS-CoV-2 infection; aOR: adjusted odds ratio; CI: confidence interval; mAb: monoclonal antibodies.
